# Supplementary material for: Detection of several volatile organic compounds through Ar+ induced chemical ionisation using inductively coupled plasma-tandem mass spectrometry (ICP-MS/MS)
Source: Royal Society of Chemistry journal article supplement (doi:10.1039/d4an00996g), 2024-01-01
Supplement: d4an00996g2.xlsx [file d4an00996g2.xlsx]

## Sheet: Sheet1
	Table S1. Calculated abundance ratios for isotoplogue related with 13C
	Analyte Gasses	m/z	Peaks*	Averaged Count Rates (cps)		Measured [M+H]+ / M+	Calculated Isotopologue
	(a) D-Benzene	82	[M–D]+	5.2208e+07		0.0977594	0.067
		83	[M–D+H]+	5.10382e+06
		84	M+	6.2294e+07		0.0664858	0.067
		85	[M+H]+	4.14167e+06
	(b) Toluene	91	[M–H]+	8.09343e+07		0.0965525	0.077
		92	[M(13C)–H]+ or M+	7.81441e+06
	(c) Ethyl Acetate	89	[M+H]+	1.50644e+06		0.0435273	0.044
		90	[M(13C)+H]+	65571.1
	(d) Methyl Butyrate	103	[M+H]+	300304		0.0465258	0.055
		104	[M(13C)+H]+	13971.9
	(e) Ethyl Butyrate	117	[M+H]+	465860		0.0596172	0.066
		118	[M(13C)+H]+	27773.2
	(f) Pentyl Acetate	131	[M+H]+	8888.7		0.0895394	0.088
		132	[M(13C)+H]+	795.889
	(g) Pyridine	79	[M+H]+	790913		0.762109	0.055
		80	[M(13C)+H]+	602761
	(f) 2-methylfuran	82	[M+H]+	924256		0.2682	0.055
		83	[M(13C)+H]+	247886
	* M(13C) denotes isotopologue of the molecues related with 13C (istopic abundance of 0.011).
